# Supplementary material
Source: PubMed Central journal article supplement (PMC4731109)

# Supplemental Figure 1

**A : D+R- infected patients**

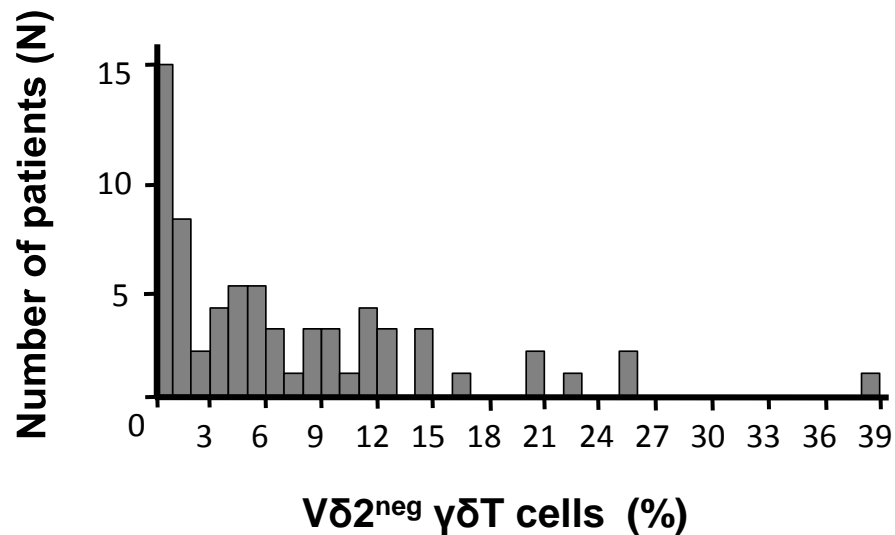

**B : R+/ATG infected patients**

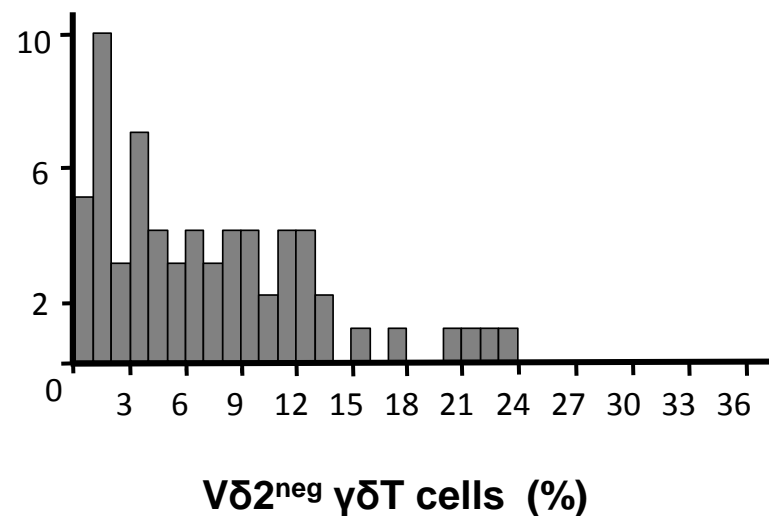

# Supplemental Figure 2

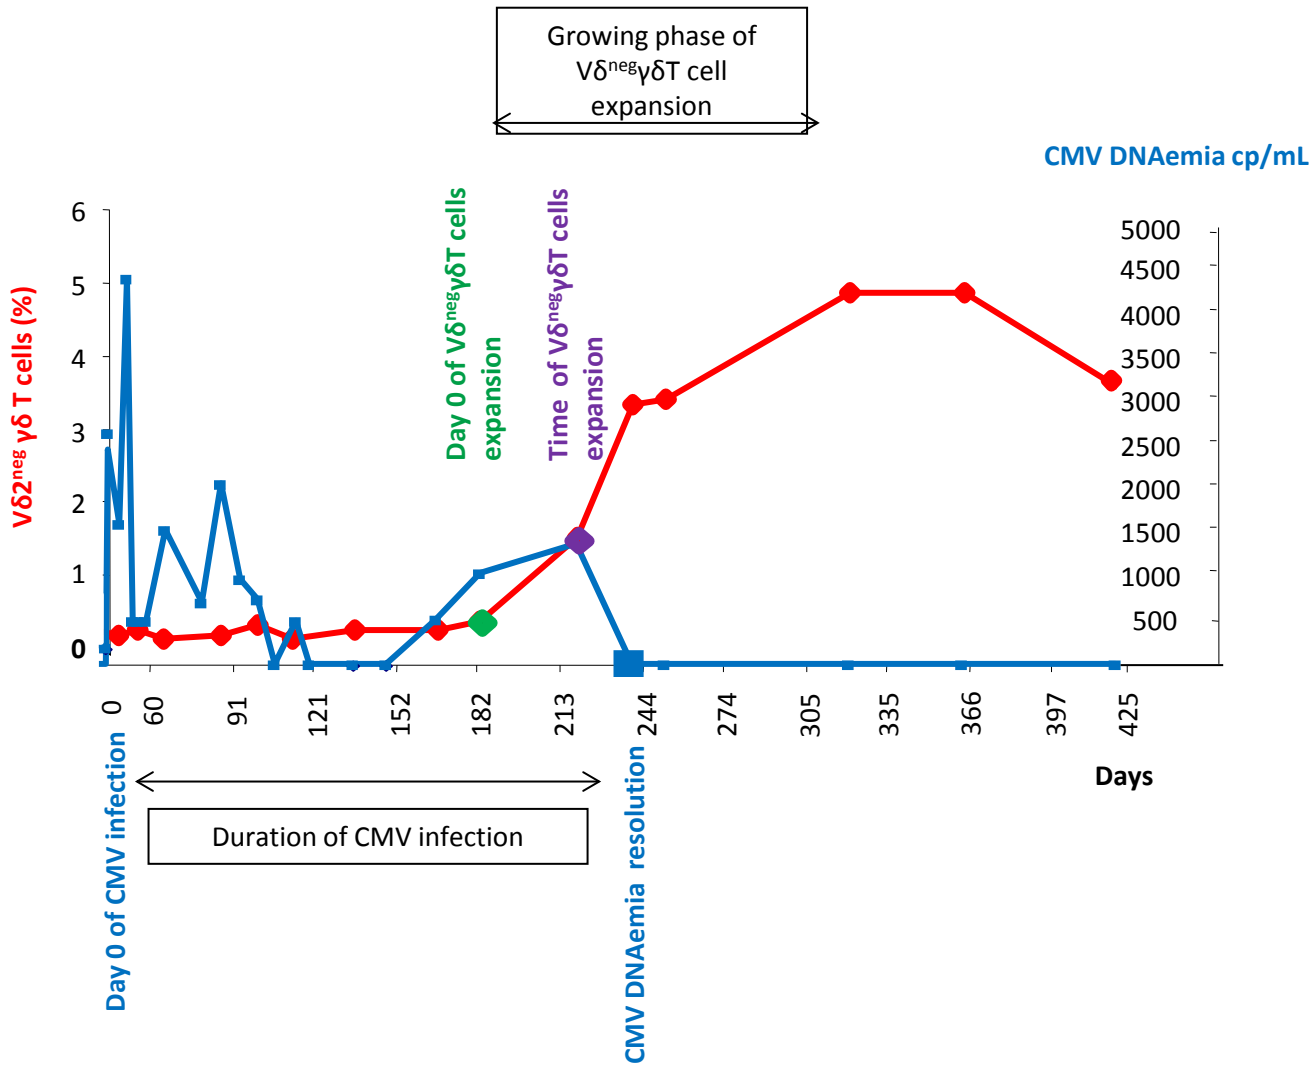

# Supplemental Figure 3

**A : D+R- infected patients  
(induction with anti IL2-R antibody)**

**B : D+R- infected patients  
(induction with ATG)**

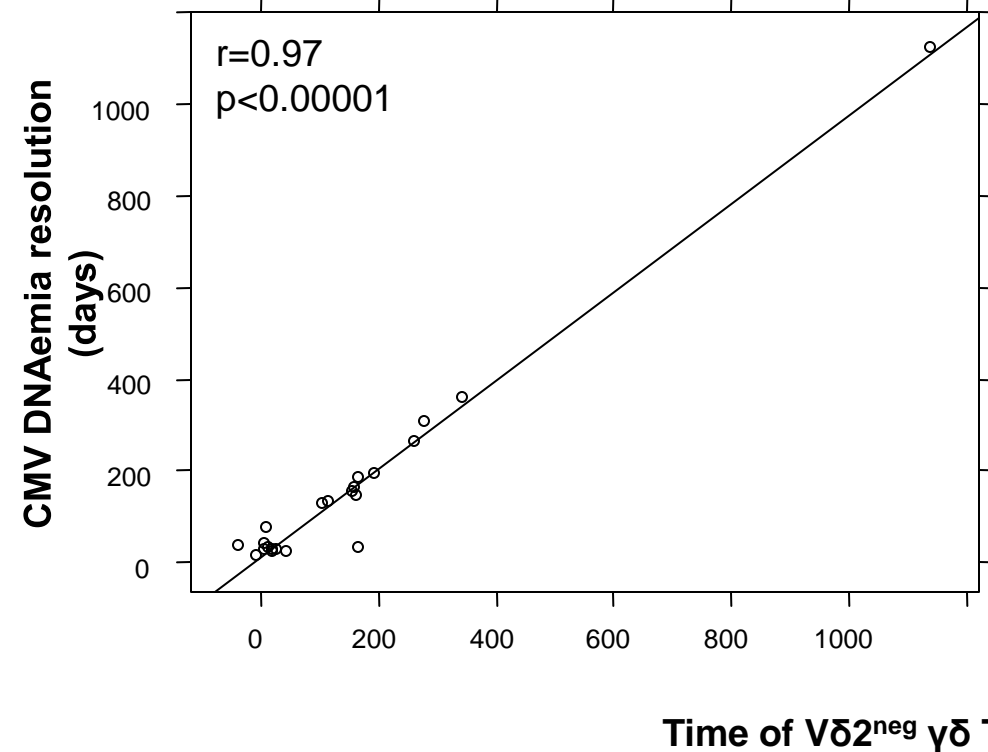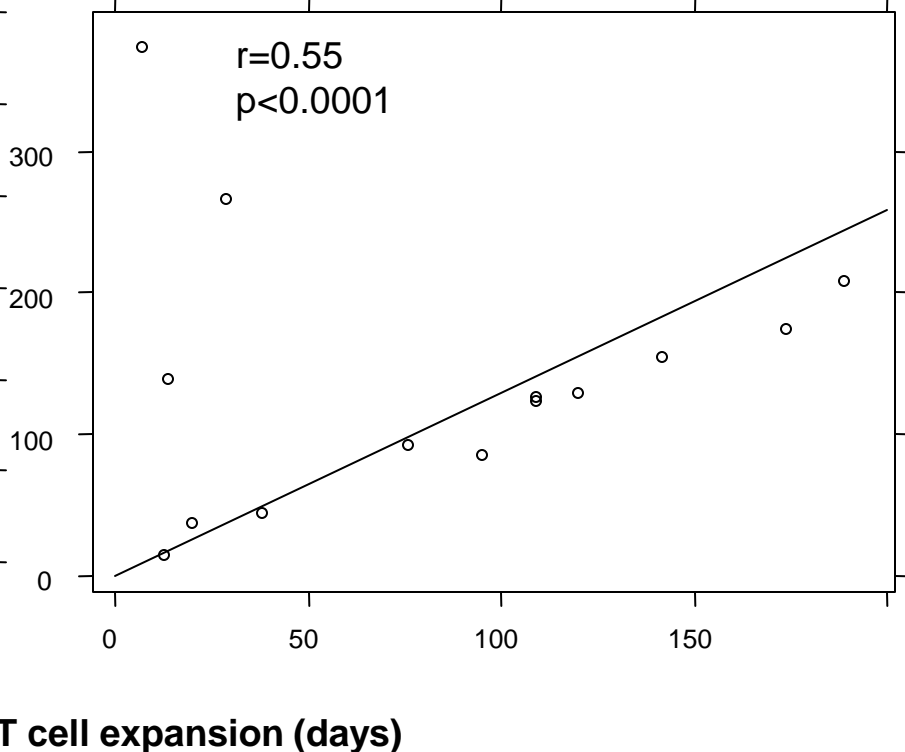

Supplement: ASN.2014100985_ASN2014100985SupplementaryData1.pdf [file ASN.2014100985_ASN2014100985SupplementaryData1.pdf]
