# Supplementary material
Source: PubMed Central journal article supplement (PMC4731109)
Supplement: ASN.2014100985_ASN2014100985SupplementaryData2.pdf [file ASN.2014100985_ASN2014100985SupplementaryData2.pdf]

## Supplement Section

**Supplemental Figure 1: Distribution of V $\delta$ 2<sup>neg</sup>  $\gamma\delta$  T cell percentages at the time of CMV DNAemia resolution.** Histograms of V $\delta$ 2<sup>neg</sup>  $\gamma\delta$  T cell percentages at the time of CMV DNAemia resolution for both D+R- infected patients (Supplementary Figure 1A) and R+/ATG infected patients (Supplementary Figure 1 B).

Abbreviations: D, donor; R, recipient; ATG, anti-thymocyte globulins.

**Supplemental Figure 2: Concomitant evolution of V $\delta$ 2<sup>neg</sup>  $\gamma\delta$  T cells and CMV DNAemia in a representative infected patient.**

Abbreviations: CMV, cytomegalovirus

**Supplemental Figure 3: Correlation between the time of V $\delta$ 2<sup>neg</sup>  $\gamma\delta$  T cell expansion and the CMV DNAemia resolution in D+R- infected patients with or without ATG.** In D+R- infected patients without ATG (3 A) and D+R- infected patients with ATG (3 B), linear regression are represented between the CMV DNAemia resolution (days) and the time of V $\delta$ 2<sup>neg</sup>  $\gamma\delta$  T cell expansion (days).

P-values were obtained using Fisher test.

Abbreviations: D, donor; R, recipient; ATG, anti-thymocyte globulins, CMV, cytomegalovirus.

## Supplemental Table

**Supplemental Table : Variables associated with the time of V $\delta$ 2<sup>neg</sup>  $\gamma\delta$  T cell expansion in**

**D+R- infected patients**

| <b>Multivariate analysis</b>                     | <b>Coefficient (SE) (days)</b> | <b>p-value<sup>a</sup></b> |
|--------------------------------------------------|--------------------------------|----------------------------|
| CMV infection vs. CMV disease                    | -6 (30)                        | 0,84                       |
| Universal prophylaxis (vs. preemptive treatment) | 30 (50)                        | 0,5                        |
| Late-onset infection/disease (yes vs. no)        | - 155 (51)                     | 0,004                      |

Abbreviations: SE, standard error

<sup>a</sup> p-values were obtained using Fisher test.
